# Supplementary material
Source: Springer Nature journal article supplement (https://www.springermedizin.de/resource/supplementary/12888_2012_1250_MOESM5_ESM.pdf/9480790)

**Control**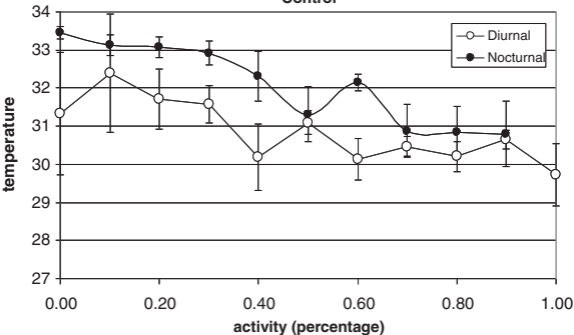**Depressive (first episode)**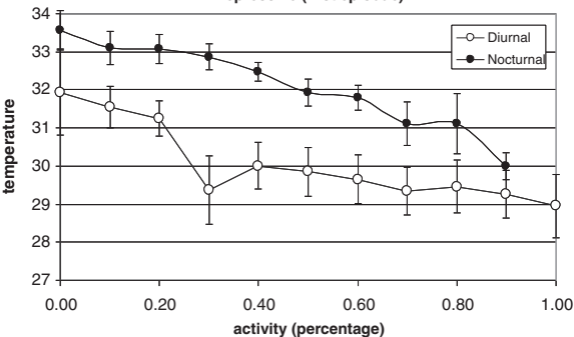**Depressive (chronic)**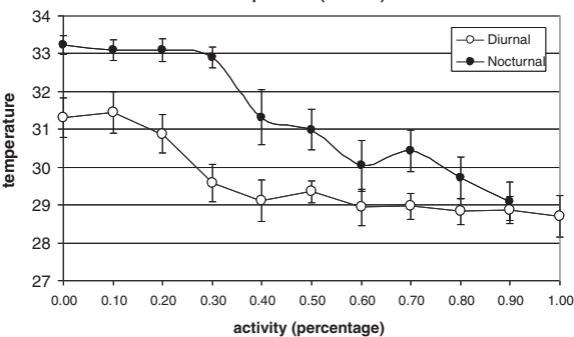

Supplement: MOESM5 [file 9480790]
